# Supplementary material for: Controlling the adsorption of osteopontin for mediating cell behaviour by using self-assembled monolayers with varying surface chemistry
Source: PubMed Central journal article supplement — RSC Adv. 2021 Nov 10;11(57):36360–6. doi: 10.1039/d1ra04063d (PMC9043331; doi:10.1039/d1ra04063d), 2021-11-10
Supplement: RA-011-D1RA04063D-s001.pdf [file RA-011-D1RA04063D-s001.pdf]

## Supporting Information

### Controlling the adsorption of osteopontin for cell behaviour by self-assembled monolayers with varying surface chemistry

Zhuoying Chen <sup>a, 1</sup>, Yan Fan <sup>b, 1</sup>, Lin Wang <sup>a, b, d</sup>, Zhengqi Bian <sup>a, c, \*</sup>, Lijing Hao <sup>a, e, f, \*</sup>

<sup>a</sup> School of Materials Science and Engineering, South China University of Technology, Guangzhou 510640, China. Email address: [msbzq@scut.edu.cn](mailto:msbzq@scut.edu.cn)

<sup>b</sup> National Engineering Research Center for Tissue Restoration and Reconstruction, Guangzhou 510006, China. Email address: [msljhao@scut.edu.cn](mailto:msljhao@scut.edu.cn)

<sup>c</sup> Key Laboratory of Biomedical Engineering of Guangdong Province, Guangzhou 510006, China.

<sup>d</sup> Key Laboratory of Biomedical Materials and Engineering of the Ministry of Education, Guangzhou 510006, China.

<sup>e</sup> Innovation Center for Tissue Restoration and Reconstruction, Guangzhou 510006, China.

<sup>f</sup> Bioland Laboratory (Guangzhou Regenerative Medicine and Health Guangdong Laboratory), 510005 Guangzhou, China.

<sup>1</sup> These authors contributed equally.

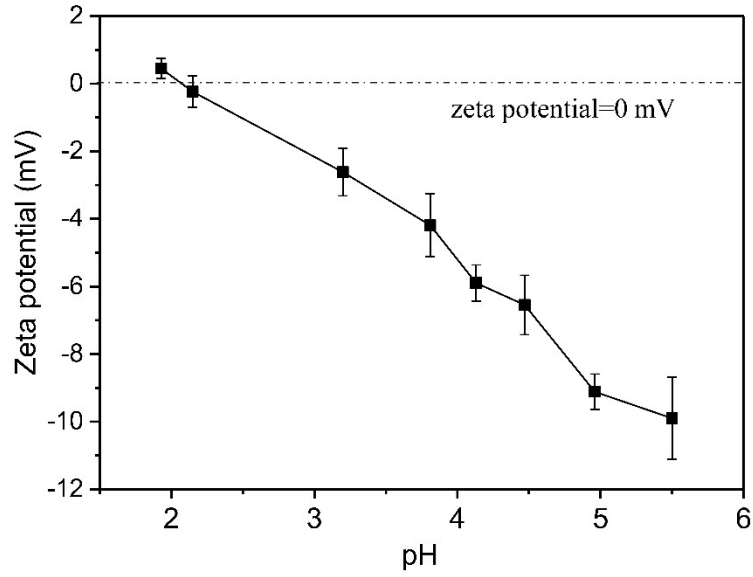

**Figure S1.** The effect of pH value on the zeta potential of OPN. The concentration of OPN was 10  $\mu\text{g/mL}$  in PBS (n=6).

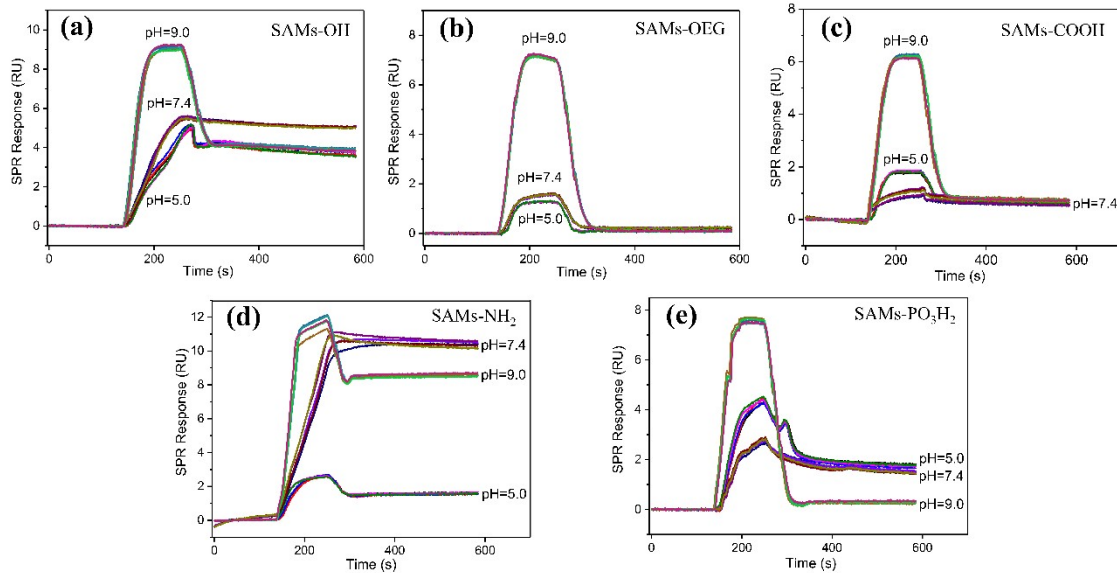

**Figure S2.** The real-time SPR sensorgrams results of OPN amount on the indicated SAMs substrates. The concentration of OPN was 10  $\mu\text{g/mL}$  in PBS (n=15).

**Table S1.** Surface characterization, protein adsorption and cell adhesion of SAMs with different chemistry groups.

|                                                         | SAMS-OH    | SAMS-OEG   | SAMs-COOH  | SAMS-NH <sub>2</sub> | SAMS-PO <sub>3</sub> H <sub>2</sub> |
|---------------------------------------------------------|------------|------------|------------|----------------------|-------------------------------------|
| Water contact angle (deg.)                              | 21.90±1.73 | 38.30±1.37 | 38.78±3.31 | 68.30±2.31           | 70.20±5.44                          |
| Zeta potential (mV)<br>(pH=7.4)                         | -59.95     | -21.49     | -83.63     | -22.09               | -55.82                              |
| OPN Mass (ng/cm <sup>2</sup> )                          | 20.44±4.73 | 3.39±0.63  | 7.23±1.02  | 89.01±13.62          | 8.50±1.98                           |
| Unit Mass of Bound mAb of<br>OPN (×10 <sup>-2</sup> )   | 2.93±0.60  | 10.69±0.61 | 7.46±0.36  | 0.91±0.04            | 7.71±0.25                           |
| BSA Mass (ng/cm <sup>2</sup> )                          | 3.49±0.27  | 0.13±0.07  | 7.72±0.54  | 53.83±1.62           | 32.26±1.26                          |
| Cell adhesion by CCK-8<br>OD value (×10 <sup>-1</sup> ) | 0.83±0.19  | 0.50±0.01  | 1.77±0.13  | 1.79±0.14            | 1.82±0.06                           |
| Fold change of gene<br>expression (α <sub>v</sub> )     | 4.16±0.29  | 1.00±0.34  | 6.18±0.73  | 5.33±0.16            | 5.71±0.68                           |
| Fold change of gene<br>expression (β <sub>3</sub> )     | 8.24±0.81  | 1.00±0.14  | 13.29±1.30 | 11.08±1.15           | 11.21±2.51                          |
